1 Knowledge, attitude and practice towards antibiotic use and resistance  
2 among the veterinarians in Bangladesh

3 Running title: Knowledge, attitude and practice towards antibiotic use and  
4 resistance

5  
6 Md Samun Sarker<sup>1</sup>, Iftekhar Ahmed<sup>2</sup>, Shariful Islam<sup>3</sup>, Ruhena Begum<sup>1</sup>, Ayesha  
7 Ahmed<sup>4</sup>, Fatema Akter Mahua<sup>4</sup>, Md Ehsanul Kabir<sup>1</sup>, Nure Alam Siddiky<sup>1</sup>,  
8 Mohammed A. Samad<sup>1\*</sup>

9  
10 <sup>1</sup> Antimicrobial Resistance Action Center (ARAC), Bangladesh Livestock Research Institute  
11 (BLRI), Savar, Dhaka-1341, Bangladesh

12 <sup>2</sup> Department of Pharmacy, Jahangirnagar University, Bangladesh

13 <sup>3</sup> EcoHealth Alliance, New York City, NY, USA

14 <sup>4</sup> Department of Public health and Informatics, Jahangirnagar University, Bangladesh

15  
16 **\* Corresponding author**

17 E-mail: [msamad@blri.gov.bd](mailto:msamad@blri.gov.bd), Tel.: +88 01717047877

18

19

20

## 21 **Abstract**

## 22 **Background**

23 The emergence of antimicrobial resistance (AMR) is growing public health concern around the  
24 world. When a number of studies have emphasized the Knowledge, Attitude and Practice (KAP)  
25 regarding antibiotic use and resistance in humans, little attention has been paid to the veterinary  
26 sector. The aim of this study was to understand the KAP towards antibiotic use and resistance  
27 among the veterinarians in Bangladesh.

## 28 **Methods**

29 A cross-sectional online based questionnaire survey was conducted from August to September  
30 2020 among the registered veterinary practitioners. A self-administered Google form  
31 questionnaire consists of 46 questions on knowledge, attitude and practice regarding antibiotic  
32 use and their resistance.

## 33 **Results**

34 A total of 208 registered veterinarians participated in this study. 85.1% of the participants were  
35 male and 55% of the participants had a Masters degree. Around 50% of the veterinarians were  
36 poultry practitioners. All respondents were familiar with antimicrobials. 91.35% of the  
37 participants knew that antibiotics can not cure viral infections while 97.6% believed that frequent  
38 antibiotic prescription rendered them less effective. Participants claimed that only they are  
39 eligible to prescribe drugs for the treatment of animals. Of the total participants, 87.02% believed  
40 that a local antimicrobial guideline would be more effective than an international one while

41 around 80% disagreed with adding antibiotics with feed/water as a growth promoter in livestock.  
42 However, gaps in practices were highlighted, suggesting training deficiencies.

## 43 **Conclusion**

44 The study for the first time conducted in Bangladesh dictates the future interventions like  
45 courses, workshops, and seminars on antibiotic usage and resistance are needed to ameliorate the  
46 awareness and change the behavior of veterinarians with regards to the rational use of antibiotics  
47 while also considering individual motivations and justifications for using antibiotics.

48

## 49 **Introduction**

50 The global development of intensive farming has led to an upsurge in antimicrobial use (AMU)  
51 that leads to the emergence and spread of antimicrobial resistance (AMR) [1]. Irrational use of  
52 antibiotics in animals are considered one of the key drivers of AMR evolution [2]. Antibiotics  
53 are used as therapeutic as well as growth promotion purposes in animal farming practices.  
54 Worldwide consumption of antibiotics in animals are very high and it is expected to rise 67% by  
55 2030 [1]. Most antibiotics are used in both human and animals interface, so the emergence of  
56 resistance through veterinary use is likely to have consequences on human health [3–5].  
57 Bangladesh has been experiencing a high incidence of AMR [6,7]. Misuse and abuse of  
58 antibiotics are common both in humans and in animals in Bangladesh [6, 8–10]. A study with 73  
59 poultry farms in Bangladesh reported higher usage of antibiotics without prescribing by  
60 registered veterinarians. The same study found the presence of residual antibiotics in 26% of the  
61 tested samples [10]. A study report revealed that majority of the antibiotics used in the poultry

62 farms were falls under Watch and Reserve group rather than Access [11]. Studies identified  
63 registered veterinarians also concerned with prescribing of higher classes of antibiotics [12,13].

64 The WHO recommends an overall reduction of medically important antimicrobial use in food-  
65 producing animals, as well as a complete cessation for disease prevention and growth promotion  
66 of food-producing animals [14]. The Government of Bangladesh has enacted “animal and fish  
67 feed act 2010” which prohibited the use of antibiotics in animal and fish feed [15], but  
68 subsequent studies showed that such laws were not properly enforced and the use of antibiotics  
69 with animal feeds is quite common [8–10]. This shows that unless raising awareness,  
70 motivational and ownership among the veterinarians, farmers, feed sellers, drug sellers, misuse  
71 of antibiotics in livestock will most likely continue to persist.

72 And any change in practice must start with the animal healthcare providers, followed by changes  
73 in the antibiotic usage among the farmers. To make effective and sustainable strategies,  
74 recommendations and treatment guidelines to maximize the therapeutic efficacy and reduce  
75 AMR in both human and animals, assessing the knowledge, attitude and practice (KAP) of  
76 veterinary practitioners are pertinent. Many countries has already been conducted similar studies  
77 to do deep this issue in a numbers perspective related to human and animals [16–20]. On the  
78 other hand, such study is still lacking from Bangladesh. In Bangladesh, the KAP regarding  
79 antibiotic use and resistance among veterinary students has been reported previously [21].  
80 Therefore, in this study, we have explored the KAP of the veterinarians of Bangladesh regarding  
81 antibiotic use and resistance. To our best knowledge, this is the first antibiotic KAP study among  
82 the Bangladeshi veterinarians.

83

84

## 85 **Materials and methods**

86 A cross-sectional study was conducted for two months from August to September, 2020 among  
87 the registered veterinary practitioners of Bangladesh listed by the Bangladesh Veterinary Council  
88 (BVC)-government regulatory body of veterinary legislation and certification for veterinary  
89 practices in Bangladesh and practicing at field level to treat and prescribe the antibiotics for the  
90 animals.

## 91 **Questionnaire development**

92 An online based maximum 20 minutes long questionnaire was developed using the Google  
93 Forms platform by a multidisciplinary team consisting of microbiologist, public health specialist  
94 and epidemiologist. The questionnaire comprised of four sections: the first one consisted of the  
95 demographic information of the veterinarians, second section included 14 questions on  
96 knowledge on antibiotics and AMR, third section contained 14 questions on attitudes and fourth  
97 section had 18 questions on practices regarding antibiotic use and their resistance. The majority  
98 of the answers were in multiple choice format. The questionnaire was pretested among the  
99 scientists at the Antimicrobial Resistance Action Center (ARAC), Bangladesh Livestock  
100 Research Institute (BLRI). The questionnaire was circulated to the participants and requested  
101 them to provide the comments, suggestions and criticism. Finally, minor changes has been made  
102 in compliance with participants response and was circulated to the participants. All the  
103 participants in the pilot study were not allowed or included in the final survey. At all the stages  
104 of data collection and analysis, we maintained anonymous information for the survey. The  
105 participation in the survey was completely non-compulsory and unpaid. The study protocol was

106 reviewed and approved by the ARAC, Animal Health Research Division, BLRI, Bangladesh  
107 (Approval no: 05/06/2020:06).

## 108 **Data collection**

109 Through social media like Facebook, LinkedIn etc. the questionnaire was posted and circulated  
110 in different veterinary professional groups. The social media based survey was launched on  
111 August 05, 2020. In mid-September, 2020, the online questionnaire link of questionnaire was  
112 also messaged or emailed to each registered veterinarian to boost the response rate.

## 113 **Statistical analysis**

114 Quantitative data were entered into MS excel-2013 (Microsoft Corporation, Redmond, WA  
115 98052, USA) and analyzed in STATA/IC-13 (StataCorp, 4905, Lakeway Drive, College station,  
116 Texas 77845, USA). Descriptive analysis was conducted to determine the frequency and  
117 percentage of responses regarding knowledge, attitude and practices. We used Chi-square test or  
118 the Fisher exact test to identify the potential association between qualitative variables with  
119 different age groups of the veterinary practitioners. The statistical significance was set at  $p$   
120  $<0.05$ .

121

## 122 **Results**

### 123 **Participants' characteristics**

124 A total number of 208 veterinarians responded and took part in the questionnaire survey from all  
125 eight administrative divisions of Bangladesh. Most of the participants were male (N=177;

126 85.1%), and 93.75% (N=195) were below 36 years of age. About 44% (N=92) had a Doctor of  
127 Veterinary Medicine (DVM) degree while about 55% (N=114) had a Master's degree. Half of  
128 the veterinarians were poultry practitioners and the rest were large, small and pet animal  
129 practitioners. Around 31% (N=65) had an experience of greater than 5 years. Detailed  
130 characteristics of the participants are presented in Table 1.

131 **Table 1. Sociodemographic characteristics of the participants**

| Characteristic                      | Number (n) | Percentage (%) |
|-------------------------------------|------------|----------------|
| <b>Gender</b>                       |            |                |
| Male                                | 177        | 85.10          |
| Female                              | 31         | 14.90          |
| <b>Education</b>                    |            |                |
| DVM                                 | 92         | 44.23          |
| Masters                             | 114        | 54.81          |
| PhD                                 | 2          | 0.96           |
| <b>Age</b>                          |            |                |
| 25-30 Years                         | 109        | 52.40          |
| 31-35 Years                         | 86         | 41.35          |
| 36-40 Years                         | 12         | 5.77           |
| Above 40 Years                      | 1          | 0.48           |
| <b>Field of expertise</b>           |            |                |
| Poultry practitioner                | 108        | 51.92          |
| Pet animals' practitioner           | 18         | 8.65           |
| Large & Small Animals' Practitioner | 82         | 39.42          |
| <b>Type of Service</b>              |            |                |
| Private Services                    | 155        | 74.52          |
| Governmental service                | 53         | 25.48          |
| <b>Years of practice</b>            |            |                |
| 0-1 Year                            | 39         | 18.75          |
| 1-3 Year                            | 63         | 30.29          |
| 3-5 Years                           | 41         | 19.71          |
| Above 5 Years                       | 65         | 31.25          |
| <b>Job location (Division)</b>      |            |                |
| Dhaka                               | 59         | 28.37          |
| Chittagong                          | 71         | 34.13          |
| Rangpur                             | 17         | 8.17           |
| Khulna                              | 3          | 1.44           |
| Rajshahi                            | 30         | 14.42          |
| Barisal                             | 8          | 3.85           |
| Mymensingh                          | 15         | 7.21           |
| Sylhet                              | 5          | 2.40           |

132

## 133 **Knowledge on antibiotics and AMR**

134 Almost all respondents were familiar with antimicrobials and antibiotics, but 17.31% were  
135 unaware that antibiotics are different from antimicrobials (Table 2). Although most participants

136 (91.35%) knew that antibiotics cannot cure viral infections, 33.65% believed the use of  
 137 antibiotics would speed up recovery from common cold, cough, and other viral infections. All of  
 138 the vets were aware of antibiotic resistance and 97.6% knew that frequent prescription of  
 139 antibiotics can render them less effective. However, some practitioners (6.73%) were unaware of  
 140 the concept of antibiotic susceptibility testing. In addition, the knowledge of antibiotics,  
 141 appropriate uses, resistance, antibiotics efficacy with organisms and effectiveness of biosecurity  
 142 for reduction of antibiotics use were pointed out similar depth of clear perception in all  
 143 categorized different aged vets (Table 3).

144 **Table 2. Veterinarian’s knowledge on antibiotic use and resistance**

| Questions                                                                                                                                      | Number (n) | Percentage (%) |
|------------------------------------------------------------------------------------------------------------------------------------------------|------------|----------------|
| 1. Are you familiar with antimicrobials? (Ans-Yes)                                                                                             |            |                |
| Yes                                                                                                                                            | 208        | 100            |
| No                                                                                                                                             | 0          | 0              |
| 2. Are you familiar with antibiotics? (Ans-Yes)                                                                                                |            |                |
| Yes                                                                                                                                            | 207        | 99.52          |
| No                                                                                                                                             | 1          | 0.48           |
| 3. Do you think antibiotics are different from antimicrobials? (Ans-Yes)                                                                       |            |                |
| Yes                                                                                                                                            | 169        | 81.25          |
| No                                                                                                                                             | 36         | 17.31          |
| Blank/No Answer                                                                                                                                | 3          | 1.44           |
| 4. Do you know about antibiotic withdrawal period? (Ans-Yes)                                                                                   |            |                |
| Yes                                                                                                                                            | 206        | 99.04          |
| No                                                                                                                                             | 2          | 0.96           |
| 5. Do you know about antibiotic susceptibility testing? (Ans-Yes)                                                                              |            |                |
| Yes                                                                                                                                            | 193        | 92.79          |
| No                                                                                                                                             | 14         | 6.73           |
| Blank                                                                                                                                          | 1          | 0.48           |
| 6. Do you know about antibiotic resistance? (Ans-Yes)                                                                                          |            |                |
| Yes                                                                                                                                            | 208        | 100.00         |
| No                                                                                                                                             | 0          | 0.00           |
| 7. Do you know any antibiotics that are prohibited to use in livestock? (Ans-Yes)                                                              |            |                |
| Yes                                                                                                                                            | 197        | 94.71          |
| No                                                                                                                                             | 10         | 4.81           |
| Blank                                                                                                                                          | 1          | 0.48           |
| 8. Antibiotics can be used to cure infections caused by bacteria (Ans -True)                                                                   |            |                |
| TRUE                                                                                                                                           | 205        | 98.56          |
| FALSE                                                                                                                                          | 2          | 0.96           |
| Blank                                                                                                                                          | 1          | 0.48           |
| 9. Antibiotics can be used to cure infections caused by viruses (Ans-False)                                                                    |            |                |
| TRUE                                                                                                                                           | 15         | 7.21           |
| FALSE                                                                                                                                          | 190        | 91.35          |
| Blank                                                                                                                                          | 3          | 1.44           |
| 10. Do you think the use of antibiotics will speed up the recovery of cold, cough, and other diseases caused by the common flu virus? (Ans-No) |            |                |
| Yes                                                                                                                                            | 70         | 33.65          |
| No                                                                                                                                             | 138        | 66.35          |
| 11. Do you think frequent prescription of antibiotics will decrease their efficacy? (Ans-Yes)                                                  |            |                |
| Yes                                                                                                                                            | 203        | 97.60          |
| No                                                                                                                                             | 4          | 1.92           |



|                                                                                                                             |     |        |
|-----------------------------------------------------------------------------------------------------------------------------|-----|--------|
| 12. Do you think antibiotics should be used for disease prevention? (Ans-No)                                                |     |        |
| Yes                                                                                                                         | 18  | 8.65   |
| No                                                                                                                          | 190 | 91.35  |
| 13. Do you think antibiotic drug residues and drug resistance will occur when antibiotics are Not used prudently? (Ans-Yes) |     |        |
| Yes                                                                                                                         | 188 | 90.38  |
| No                                                                                                                          | 19  | 9.13   |
| 14. Do you think biosecurity and improved hygiene can reduce the use of antibiotics? (Ans-Yes)                              |     |        |
| Yes                                                                                                                         | 208 | 100.00 |
| No                                                                                                                          | 0   | 0.00   |

145

146 **Table 3. Relationship between veterinarian’s knowledge on antibiotic use/resistance to age**

147 **groups**

| Knowledge<br>Statements                                                                                                               | Univariate analysis |            |            |         |
|---------------------------------------------------------------------------------------------------------------------------------------|---------------------|------------|------------|---------|
|                                                                                                                                       | Age groups          |            |            | P value |
|                                                                                                                                       | 25-30=1             | 31-35=2    | >36        |         |
| 1. Do you know ‘antimicrobial’? (Ans-Yes)                                                                                             |                     |            |            |         |
| Yes                                                                                                                                   | 109 (100)           | 86 (100)   | 13 (100)   |         |
| No                                                                                                                                    |                     |            |            |         |
| 2. Are you familiar with the concept of antibiotics? (Ans-Yes)                                                                        |                     |            |            |         |
| Yes                                                                                                                                   | 109 (100)           | 85 (98.88) | 13 (100)   |         |
| No                                                                                                                                    | 0                   | 1 (01.12)  | 0          | 0.49    |
| 3. Do you think that antibiotic is different from antimicrobials? (Ans-Yes)                                                           |                     |            |            |         |
| Yes                                                                                                                                   | 88 (80.73)          | 70 (81.40) | 11 (84.62) |         |
| No                                                                                                                                    | 20 (18.35)          | 14 (16.28) | 02 (15.38) |         |
| Blank/No Answer                                                                                                                       | 01 (0.92)           | 02 (02.33) | 0          | 0.905   |
| 4. Do you know about antibiotic withdrawal period? (Ans-Yes)                                                                          |                     |            |            |         |
| Yes                                                                                                                                   | 108 (99.08)         | 85 (98.84) | 13 (100)   |         |
| No                                                                                                                                    | 01 (0.92)           | 01 (01.16) | 0          | 0.921   |
| 5. Do you know about antibiotic susceptibility testing? (Ans-Yes)                                                                     |                     |            |            |         |
| Yes                                                                                                                                   | 101 (92.66)         | 82 (95.35) | 10 (76.92) |         |
| No                                                                                                                                    | 08 (07.34)          | 03 (03.49) | 03 (06.73) |         |
| Blank                                                                                                                                 | 0                   | 01 (01.16) | 0          | 0.078   |
| 6. Do you know about antibiotic resistance? (Ans-Yes)                                                                                 |                     |            |            |         |
| Yes                                                                                                                                   | 109 (100)           | 86 (100)   | 13 (100)   |         |
| No                                                                                                                                    |                     |            |            |         |
| 7. Do you know any antibiotics that are prohibited to use in livestock? (Ans-Yes)                                                     |                     |            |            |         |
| Yes                                                                                                                                   | 105 (96.33)         | 80 (93.02) | 12 (92.31) |         |
| No                                                                                                                                    | 04 (03.67)          | 05 (05.81) | 01 (07.69) |         |
| Blank                                                                                                                                 | 0                   | 01 (01.16) | 0          | 0.702   |
| 8. Antibiotics can be used to cure infections caused by bacteria (Ans - True)                                                         |                     |            |            |         |
| True                                                                                                                                  | 107 (98.17)         | 85 (98.84) | 13 (100)   |         |
| False                                                                                                                                 | 02 (01.83)          | 0.00       | 0          |         |
| Blank                                                                                                                                 | 0                   | 01 (01.16) | 0          | 0.518   |
| 9. Antibiotics can be used to cure infections caused by virus (Ans-False)                                                             |                     |            |            |         |
| True                                                                                                                                  | 09 (08.26)          | 06 (06.98) | 0          |         |
| False                                                                                                                                 | 98 (89.91)          | 79 (91.86) | 13 (100)   |         |
| Blank                                                                                                                                 | 0                   | 01 (01.16) | 0          | 0.81    |
| 10. Do you think the use of antibiotics will speed up recovery of cold, cough and other diseases caused by common flu virus? (Ans-No) |                     |            |            |         |
| Yes                                                                                                                                   | 42 (38.53)          | 25 (29.07) | 03 (23.08) |         |
| No                                                                                                                                    | 67 (61.47)          | 61 (70.93) | 10 (76.92) | 0.269   |
| 11. Do you think frequent prescribe of antibiotics will decrease the efficacy of drug? (Ans-Yes)                                      |                     |            |            |         |

|                                                                                                                             |             |            |            |        |
|-----------------------------------------------------------------------------------------------------------------------------|-------------|------------|------------|--------|
| Yes                                                                                                                         | 107 (98.17) | 83 (96.51) | 13 (100)   |        |
| No                                                                                                                          | 01 (0.92)   | 03 (03.49) | 0          |        |
| Blank                                                                                                                       | 01 (0.92)   | 0.00       | 0          | 0.583  |
| 12. Do you think antibiotic should be used for disease prevention? (Ans-No)                                                 |             |            |            |        |
| Yes                                                                                                                         | 08 (07.34)  | 07 (08.14) | 03 (23.08) |        |
| No                                                                                                                          | 101 (92.66) | 79 (91.86) | 10 (76.35) | 0.158  |
| 13. Do you think antibiotic drug residues and drug resistance will occur when antibiotics are not used prudently? (Ans-Yes) |             |            |            |        |
| Yes                                                                                                                         | 104 (95.41) | 75 (87.21) | 09 (69.23) |        |
| No                                                                                                                          | 05 (04.59)  | 11 (12.79) | 03 (23.08) |        |
| Blank                                                                                                                       | 0           | 0.00       | 01 (07.69) | 0.0001 |
| 14. Do you think biosecurity and improved hygiene can reduce the use of antibiotics? (Ans-Yes)                              |             |            |            |        |
| Yes                                                                                                                         | 109 (100)   | 86 (100)   | 13 (100)   |        |

148

## 149 **Attitude towards antibiotic use and resistance**

150 Out of the 208 participants, 207 opinioned that only veterinarians are eligible to prescribe drugs  
 151 for animals (Table 4). Moreover, nearly all agreed that antibiotic abuse is prevalent in veterinary  
 152 practices in Bangladesh. Practitioners also had a positive attitude towards vaccination for the  
 153 purpose of preventing diseases and for reducing the use of antibiotics in animals. Most  
 154 practitioners (99.04%) felt that national guideline on rational antibiotic use is necessary and  
 155 87.02% believed a local antimicrobial guideline would be more useful than an international one.  
 156 Around 80% disagreed with adding antibiotics with feed/water as a growth promoter in poultry  
 157 and livestock. Regarding the major reasons of antibiotic resistance, irrational use of antibiotics  
 158 was identified as the primary cause by 94.71%, followed by over-the-counter use, low dose, low-  
 159 quality antibiotics, and waste disposal of antibiotics (Fig 1). Besides, the attitude towards  
 160 antibiotics use and resistance among different aged group vets were varied especially in middle  
 161 aged vets (31-35 years). The lack of exposure and training regarding antibiotics in middle aged  
 162 vets has impacts on attitude regarding antibiotics and resistance. Importantly, all vets group  
 163 showed indifference attitude if individual or animal could not be treated with antibiotics.

164 Besides, almost all practitioners agreed that vaccination could reduce the use of antibiotics and  
 165 resistance (Table 5).

166 **Table 4. Practitioner’s attitude towards antibiotic use and resistance**

| Questions                                                                                                   | Number (n) | Percentage (%) |
|-------------------------------------------------------------------------------------------------------------|------------|----------------|
| 1. In your opinion, only veterinarians are eligible to prescribe drugs for animals                          |            |                |
| Yes                                                                                                         | 207        | 99.52          |
| No                                                                                                          | 1          | 0.48           |
| 2. At present, there is abuse of antibiotics                                                                |            |                |
| Yes                                                                                                         | 205        | 98.56          |
| No                                                                                                          | 3          | 1.44           |
| 3. Antibiotic resistance affects you and your family’s health                                               |            |                |
| Agree                                                                                                       | 206        | 99.04          |
| Disagree                                                                                                    | 0          | 0.00           |
| Neutral                                                                                                     | 2          | 0.96           |
| 4. When a disease in an individual can’t be treated with antibiotics, how serious do you think it could be? |            |                |
| Very serious                                                                                                | 119        | 57.21          |
| Serious                                                                                                     | 53         | 25.48          |
| Less serious                                                                                                | 11         | 5.29           |
| Not serious at all                                                                                          | 24         | 11.54          |
| Blank                                                                                                       | 1          | 0.48           |
| 5. When a disease in an animal cannot be treated with antibiotics, how serious do you think it could be?    |            |                |
| Very serious                                                                                                | 114        | 54.81          |
| Serious                                                                                                     | 60         | 28.85          |
| Less serious                                                                                                | 10         | 4.81           |
| Not serious at all                                                                                          | 22         | 10.58          |
| Blank                                                                                                       | 2          | 0.96           |
| 6. Do you think vaccination can prevent disease?                                                            |            |                |
| Yes                                                                                                         | 207        | 99.52          |
| No                                                                                                          | 1          | 0.48           |
| 7. Do you think vaccination can reduce the use of antibiotics?                                              |            |                |
| Yes                                                                                                         | 203        | 97.60          |
| No                                                                                                          | 5          | 2.40           |
| 8. Is it necessary to establish a law on “Rational use of antibiotics” at the national level?               |            |                |
| Yes                                                                                                         | 206        | 99.04          |
| No                                                                                                          | 2          | 0.96           |
| 9. A local antimicrobial guideline would be more useful than an international one                           |            |                |
| Yes                                                                                                         | 181        | 87.02          |
| No                                                                                                          | 26         | 12.50          |
| Blank                                                                                                       | 1          | 0.48           |
| 10. It is important to add antibiotics with feed/water as a growth promoter in livestock                    |            |                |
| Agree                                                                                                       | 10         | 4.81           |
| Disagree                                                                                                    | 165        | 79.33          |
| Neutral                                                                                                     | 32         | 15.38          |
| Blank                                                                                                       | 1          | 0.48           |
| 11. Inappropriate use or half course of antibiotics leads to antibiotic resistance                          |            |                |
| Agree                                                                                                       | 203        | 97.60          |
| Disagree                                                                                                    | 1          | 0.48           |
| Neutral                                                                                                     | 3          | 1.44           |
| Blank                                                                                                       | 1          | 0.48           |
| 12. An appropriate withdrawal period is needed before selling to avoid antibiotic residue in food animals?  |            |                |
| Agree                                                                                                       | 205        | 98.56          |
| Disagree                                                                                                    | 0          | 0.00           |
| Neutral                                                                                                     | 2          | 0.96           |
| Blank                                                                                                       | 1          | 0.48           |
| 14. Have you ever attended any training/conference/seminar/workshop on antimicrobial resistance?            |            |                |
| Yes                                                                                                         | 127        | 61.06          |
| No                                                                                                          | 81         | 38.94          |

167 **Fig 1. Major reasons of AMR indicated by the veterinarians**

168 **Table 5. Relationship between veterinarian’s attitude on antibiotic use/resistance and age**  
 169 **groups**

| Attitude Statements                                                                                       | Univariate analysis |            |            |         |
|-----------------------------------------------------------------------------------------------------------|---------------------|------------|------------|---------|
|                                                                                                           | Age group           |            |            | P value |
|                                                                                                           | 25-30=1             | 31-35=2    | >36        |         |
| 1. In your opinion, only veterinarians are eligible for drugs prescriptions for animals?                  |                     |            |            |         |
| Yes                                                                                                       | 108 (99.08)         | 86 (100)   | 13 (100)   |         |
| No                                                                                                        | 01 (0.92)           | 0.00       | 0          | 0.634   |
| 2. At present, there is abuse of antibiotics                                                              |                     |            |            |         |
| Yes                                                                                                       | 107 (98.17)         | 85 (98.84) | 13 (100)   |         |
| No                                                                                                        | 02 (01.83)          | 01 (01.16) | 0          | 0.837   |
| 3. Antibiotic resistance affects you and your family’s health                                             |                     |            |            |         |
| Agree                                                                                                     | 108 (99.08)         | 85 (98.84) | 13 (100)   |         |
| Disagree                                                                                                  | 0                   | 0.00       | 0          |         |
| Neutral                                                                                                   | 01 (0.92)           | 01 (01.16) | 0          | 0.921   |
| 4. When a disease in individual can't be treated with antibiotics, how serious do you think it could be?  |                     |            |            |         |
| Very serious                                                                                              | 67 (61.47)          | 46 (53.49) | 06 (46.15) |         |
| Serious                                                                                                   | 24 (22.02)          | 26 (30.23) | 03 (23.08) |         |
| Less serious                                                                                              | 09 (08.26)          | 02 (02.33) | 0          |         |
| Not serious at all                                                                                        | 08 (07.34)          | 12 (13.95) | 04 (30.77) |         |
| Blank                                                                                                     | 01 (0.92)           | 0.00       | 0          | 0.104   |
| 5. When a disease in animal cannot be treated with antibiotics, how serious do you think it could be?     |                     |            |            |         |
| Very serious                                                                                              | 64 (58.72)          | 44 (51.16) | 06 (46.15) |         |
| Serious                                                                                                   | 28 (25.69)          | 29 (33.72) | 03 (23.08) |         |
| Less serious                                                                                              | 08 (07.34)          | 02 (02.33) | 0          |         |
| Not serious at all                                                                                        | 08 (07.34)          | 10 (11.63) | 04 (30.77) |         |
| Blank                                                                                                     | 01 (0.92)           | 01 (01.16) | 0          | 0.177   |
| 6. Do you think vaccination can prevent disease?                                                          |                     |            |            |         |
| Yes                                                                                                       | 108 (99.08)         | 86 (100)   | 13 (100)   |         |
| No                                                                                                        | 01 (0.92)           | 0.00       | 0          | 0.634   |
| 7. Do you think vaccination can reduce the uses of antibiotics?                                           |                     |            |            |         |
| Yes                                                                                                       | 105 (96.33)         | 85 (98.84) | 13 (100)   |         |
| No                                                                                                        | 04 (03.67)          | 01 (01.16) | 0          | 0.443   |
| 8. Is it necessary to establish a law on “Rational use of antibiotics” at the national level?             |                     |            |            |         |
| Yes                                                                                                       | 107 (98.17)         | 86 (100)   | 13 (100)   |         |
| No                                                                                                        | 02 (01.83)          | 0.00       | 0          | 0.4     |
| 9. A local antimicrobial guideline would be more useful than international one                            |                     |            |            |         |
| Yes                                                                                                       | 91 (83.49)          | 79 (91.86) | 11 (84.62) |         |
| No                                                                                                        | 17 (15.60)          | 07 (08.14) | 02 (15.38) |         |
| Blank                                                                                                     | 01 (0.92)           | 0.00       | 0          | 0.472   |
| 10. It is important to add antibiotic with feed/water as growth promoter in livestock                     |                     |            |            |         |
| Agree                                                                                                     | 02 (01.83)          | 08 (09.30) | 0          |         |
| Disagree                                                                                                  | 89 (81.65)          | 67 (77.91) | 09 (69.23) |         |
| Neutral                                                                                                   | 17 (15.60)          | 11 (12.79) | 04 (30.77) |         |
| Blank                                                                                                     | 01 (0.92)           | 0.00       | 0          | 0.134   |
| 11. Inappropriate use or half course of antibiotics leads to antibiotic resistance                        |                     |            |            |         |
| Agree                                                                                                     | 108 (99.08)         | 85 (98.84) | 10 (76.92) |         |
| Disagree                                                                                                  | 0                   | 0.00       | 1 (07.69)  |         |
| Neutral                                                                                                   | 0                   | 01 (01.16) | 02 (15.38) |         |
| Blank                                                                                                     | 01 (0.92)           | 0.00       | 0          | 0.0001  |
| 12. An appropriate withdrawal period is needed before selling to avoid antibiotic residue in food animal? |                     |            |            |         |
| Agree                                                                                                     | 108 (99.08)         | 84 (97.67) | 13 (100)   |         |
| Disagree                                                                                                  | 0                   | 0.00       | 0          |         |
| Neutral                                                                                                   | 0                   | 02 (02.33) | 0          |         |
| Blank                                                                                                     | 01 (0.92)           | 0.00       | 0          | 0.44    |
| 14. Have you ever attended any training/conference/seminar/workshop on antimicrobial resistance?          |                     |            |            |         |
| Yes                                                                                                       | 69 (63.30)          | 49 (56.98) | 09 (69.23) |         |
| No                                                                                                        | 40 (36.70)          | 37 (43.02) | 04 (30.77) | 0.549   |

170

## 171 **The practice of the veterinarians regarding antibiotic prescribing**

172 The majority (70.19%) of the veterinarians reported that they sometimes prescribe antibiotics  
173 over the phone or without examining the animals (Table 6). Also, only 9.1% of the practitioners  
174 always or often recommend antimicrobial susceptibility testing before prescribing an antibiotic  
175 agents. Half of the participants prefer broad-spectrum antibiotics while the other half prefer  
176 narrow-spectrum antibiotics. Results also show that antibiotics constitute a large percentage of  
177 daily prescribed drugs. Moreover, combined antibiotic therapy is also preferred to single therapy  
178 by about 65% of the practitioners, and old generation antibiotics are preferred to new generation  
179 antibiotics by most (63.46%) as a first-line treatment. Some practitioners (25.96%) reported  
180 prescribing antibiotics without determining the bodyweight of the animals. Most practitioners  
181 (74.52) do not mention the antibiotic withdrawal period in the prescriptions. When exploring the  
182 factors considered by the vets while prescribing antibiotics, the severity of the disease was found  
183 to be the most important factor (Fig 2). The vets also considered other factors such as availability  
184 of an antibiotic in the local market, culture sensitivity test report, economic status of the owner,  
185 and owners' demand for antibiotics. There was no significant variation in relation with  
186 practitioners age and antibiotic practices. But, young veterinarians were more concerned  
187 regarding drug choice, antibiotic susceptibility testing, resistance patterns with compared to  
188 middle aged vets where experienced vets group showed same level of expertise (Table 7).

189

190

191

192 **Table 6. Practice of veterinary practitioner's regarding antibiotic and resistance**

| Questions                                                                                                                                 | Number (n) | Percentage (%) |
|-------------------------------------------------------------------------------------------------------------------------------------------|------------|----------------|
| 1. Do you prescribe antibiotics over phone or without seeing/examining animals?                                                           |            |                |
| Often/Always                                                                                                                              | 6          | 2.88           |
| Sometimes                                                                                                                                 | 146        | 70.19          |
| Never/rarely                                                                                                                              | 56         | 26.92          |
| 2. Do you have facilities in your area to test antimicrobial sensitivity?                                                                 |            |                |
| Yes                                                                                                                                       | 93         | 44.71          |
| No                                                                                                                                        | 115        | 55.29          |
| 3. How often on a first visit to a farm you suggest antimicrobial susceptibility testing if you suspect a bacterial infection is present? |            |                |
| Often/Always                                                                                                                              | 19         | 9.13           |
| Sometimes                                                                                                                                 | 104        | 50.00          |
| Never/rarely                                                                                                                              | 85         | 40.87          |
| 4. How often do you carry out antimicrobial susceptibility testing, when a pathogen has not responded to the first antibiotic used?       |            |                |
| Often/Always                                                                                                                              | 41         | 19.71          |
| Sometimes                                                                                                                                 | 111        | 53.37          |
| Never/rarely                                                                                                                              | 56         | 26.92          |
| 5. How often do you encounter a poor clinical response to an antimicrobial used?                                                          |            |                |
| Often/Always                                                                                                                              | 19         | 9.13           |
| Sometimes                                                                                                                                 | 170        | 81.73          |
| Never/rarely                                                                                                                              | 17         | 8.17           |
| Blank                                                                                                                                     | 2          | 0.96           |
| 6. How commonly do you feel that poor clinical response may be due to antimicrobial resistance?                                           |            |                |
| Often/Always                                                                                                                              | 76         | 36.54          |
| Sometimes                                                                                                                                 | 124        | 59.62          |
| Never/rarely                                                                                                                              | 7          | 3.37           |
| Blank                                                                                                                                     | 1          | 0.48           |
| 7. How often have you had to change an antimicrobial agent because of resistance confirmed on antimicrobial susceptibility testing?       |            |                |
| Often/Always                                                                                                                              | 50         | 24.04          |
| Sometimes                                                                                                                                 | 118        | 56.73          |
| Never/rarely                                                                                                                              | 39         | 18.75          |
| Blank                                                                                                                                     | 1          | 0.48           |
| 9. Which spectrum of antibiotics do you prefer most?                                                                                      |            |                |
| Broad spectrum                                                                                                                            | 104        | 50.00          |
| Narrow spectrum                                                                                                                           | 104        | 50.00          |
| 10. What percentage of your daily prescriptions has antibiotics?                                                                          |            |                |
| <20                                                                                                                                       | 54         | 25.96          |
| 20% to 40%                                                                                                                                | 95         | 45.67          |
| 40% to 60%                                                                                                                                | 59         | 28.37          |
| Above 60%                                                                                                                                 | 0          | 0.00           |
| 11. Do you mention withdrawal period in the prescription?                                                                                 |            |                |
| Yes                                                                                                                                       | 53         | 25.48          |
| No                                                                                                                                        | 155        | 74.52          |
| 12. Do you suggest keeping drug register of animals?                                                                                      |            |                |
| Yes                                                                                                                                       | 155        | 74.52          |
| No                                                                                                                                        | 52         | 25.00          |
| Blank                                                                                                                                     | 1          | 0.48           |
| 13. Do you prefer combine antibiotics to ensure therapeutic success?                                                                      |            |                |
| Yes                                                                                                                                       | 135        | 64.90          |
| No                                                                                                                                        | 73         | 35.10          |
| 14. Do you administer antibiotics to animals without determining their body weight properly?                                              |            |                |
| Yes                                                                                                                                       | 54         | 25.96          |
| No                                                                                                                                        | 153        | 73.56          |
| Blank                                                                                                                                     | 1          | 0.48           |
| 15. Do you consider whether an infection is self-limiting before prescribing antibiotics?                                                 |            |                |
| Yes                                                                                                                                       | 162        | 77.88          |
| No                                                                                                                                        | 44         | 21.15          |
| Blank                                                                                                                                     | 2          | 0.96           |
| 16. As the first line of treatment, do you choose new generation antibiotics rather than older generations like penicillin?               |            |                |
| Yes                                                                                                                                       | 76         | 36.54          |
| No                                                                                                                                        | 132        | 63.46          |
| 17. Do you consult with other veterinarian/other educational resources when in doubt of a drug's mechanism of action?                     |            |                |
| Yes                                                                                                                                       | 199        | 95.67          |

|                                                                                     |     |       |
|-------------------------------------------------------------------------------------|-----|-------|
| No                                                                                  | 9   | 4.33  |
| 18. Do you suggest clients to vaccinate their animals against preventable diseases? |     |       |
| Yes                                                                                 | 205 | 98.56 |
| No                                                                                  | 3   | 1.44  |

193

194

195 **Fig 2. Factors considered by veterinarians while prescribing antibiotics**

196 **Table 7. Relationship between veterinarian’s practice on antibiotic use leads to antibiotic**

197 **resistance and age groups**

| Practice<br>Statements                                                                                                                    | Univariate analysis |            |            | P value |
|-------------------------------------------------------------------------------------------------------------------------------------------|---------------------|------------|------------|---------|
|                                                                                                                                           | Age groups          |            |            |         |
|                                                                                                                                           | 25-30=1             | 31-35=2    | >36        |         |
| 1. Do you prescribe antibiotics over phone or without seeing/examining animals?                                                           |                     |            |            |         |
| Often/Always                                                                                                                              | 05 (04.59)          | 01 (01.16) | 0          |         |
| Sometimes                                                                                                                                 | 70 (64.22)          | 67 (77.91) | 09 (69.23) |         |
| Never/rarely                                                                                                                              | 34 (31.19)          | 18 (20.93) | 04 (30.77) | 0.231   |
| 2. Do you have facilities in your area to test antimicrobial sensitivity?                                                                 |                     |            |            |         |
| Yes                                                                                                                                       | 46 (42.20)          | 43 (50.00) | 04 (30.77) |         |
| No                                                                                                                                        | 63 (57.80)          | 43 (50.00) | 09 (69.23) | 0.321   |
| 3. How often on a first visit to a farm you suggest antimicrobial susceptibility testing if you suspect a bacterial infection is present? |                     |            |            |         |
| Often/Always                                                                                                                              | 08 (07.34)          | 10 (11.63) | 01 (07.69) |         |
| Sometimes                                                                                                                                 | 57 (52.29)          | 41 (47.67) | 06 (46.15) |         |
| Never/rarely                                                                                                                              | 44 (40.37)          | 35 (40.70) | 06 (46.15) | 0.854   |
| 4. How often do you suggest antimicrobial susceptibility testing, when a pathogen has not responded to the first antibiotic used?         |                     |            |            |         |
| Often/Always                                                                                                                              | 25 (22.94)          | 14 (16.28) | 02 (15.38) |         |
| Sometimes                                                                                                                                 | 60 (55.05)          | 44 (51.16) | 07 (53.85) |         |
| Never/rarely                                                                                                                              | 24 (22.02)          | 28 (32.56) | 04 (30.77) | 0.492   |
| 5. How often do you encounter a poor clinical response to an antimicrobial used?                                                          |                     |            |            |         |
| Often/Always                                                                                                                              | 14 (12.84)          | 05 (05.81) | 0          |         |
| Sometimes                                                                                                                                 | 82 (75.23)          | 75 (87.21) | 13 (100)   |         |
| Never/rarely                                                                                                                              | 11 (10.09)          | 06 (06.98) | 0          |         |
| Blank                                                                                                                                     | 02 (01.83)          | 0.00       | 0          | 0.185   |
| 6. How commonly do you feel that poor clinical response may be due to antimicrobial resistance?                                           |                     |            |            |         |
| Often/Always                                                                                                                              | 48 (44.04)          | 24 (27.91) | 04 (30.77) |         |
| Sometimes                                                                                                                                 | 56 (51.38)          | 60 (69.77) | 08 (61.54) |         |
| Never/rarely                                                                                                                              | 05 (04.59)          | 01 (01.16) | 01 (07.69) |         |
| Blank                                                                                                                                     | 0                   | 01 (01.16) | 0          | 0.118   |
| 7. How often have you had to change an antimicrobial agent because of resistance confirmed on antimicrobial susceptibility testing?       |                     |            |            |         |
| Often/Always                                                                                                                              | 23 (21.10)          | 23 (26.74) | 04 (30.77) |         |
| Sometimes                                                                                                                                 | 65 (59.63)          | 46 (53.49) | 07 (53.85) |         |
| Never/rarely                                                                                                                              | 21 (19.27)          | 16 (18.60) | 02 (15.38) |         |
| Blank                                                                                                                                     | 0                   | 01 (01.16) | 0          | 0.839   |
| 8. What are the factor/factors you consider for prescribing antibiotics?                                                                  |                     |            |            |         |
| Severity of the disease                                                                                                                   | 53                  | 32.00      | 6          |         |
| Culture sensitivity test report                                                                                                           | 5                   | 4.00       | 2          |         |
| Economic status of the owner                                                                                                              | 1                   |            |            |         |
| Availability at the local market                                                                                                          | 3                   |            |            |         |
| Owner`s demand, Severity of the disease, Availability at the local market                                                                 | 1                   |            |            |         |
| Severity of the disease, Culture sensitivity test report                                                                                  | 9                   | 4.00       |            |         |
| Severity of the disease, Availability at the local market, Culture sensitivity test report                                                | 10                  | 6.00       |            |         |
| Severity of the disease, Availability at the local market                                                                                 | 4                   | 11.00      |            |         |
| Economic status of the owner, Severity of the disease                                                                                     | 5                   | 2.00       |            |         |

|                                                                                                                                          |             |            |            |       |
|------------------------------------------------------------------------------------------------------------------------------------------|-------------|------------|------------|-------|
| Economic status of the owner, Severity of the disease, Availability at the local market, Culture sensitivity test report                 | 8           | 8.00       | 1          |       |
| Economic status of the owner, Severity of the disease, Availability at the local market                                                  | 7           | 11.00      | 1          |       |
| Availability at the local market, Culture sensitivity test report                                                                        |             | 1.00       |            |       |
| Economic status of the owner, Availability at the local market                                                                           |             |            | 1          |       |
| Economic status of the owner, Severity of the disease, Culture sensitivity test report                                                   | 1           | 1.00       |            |       |
| Owner`s demand, Economic status of the owner, Severity of the disease                                                                    | 1           |            |            |       |
| Owner`s demand, Economic status of the owner, Severity of the disease, Availability at the local market                                  | 2           | 3.00       | 1          |       |
| Owner`s demand, Economic status of the owner, Severity of the disease, Availability at the local market, Culture sensitivity test report |             | 2.00       | 1          |       |
| Owner`s demand, Economic status of the owner, Severity of the disease, Availability at the local market, Culture sensitivity test report |             |            |            | 0.059 |
| 9. Which spectrum of antibiotics do you prefer most?                                                                                     |             |            |            |       |
| Broad spectrum                                                                                                                           | 55 (50.46)  | 41 (47.67) | 08 (61.54) |       |
| Narrow spectrum                                                                                                                          | 54 (49.54)  | 45 (52.33) | 05 (38.46) | 0.664 |
| 10. What percentage of your daily prescriptions has antibiotics?                                                                         |             |            |            |       |
| <20                                                                                                                                      | 29 (26.61)  | 21 (24.42) | 04 (30.77) |       |
| 20% to 40%                                                                                                                               | 48 (44.04)  | 41 (47.67) | 06 (46.15) |       |
| 40% to 60%                                                                                                                               | 32 (29.36)  | 24 (27.91) | 03 (23.08) |       |
| Above 60%                                                                                                                                | 0           | 0.00       | 0          | 0.972 |
| 11. Do you mention withdrawal period in the prescription?                                                                                |             |            |            |       |
| Yes                                                                                                                                      | 35 (32.11)  | 16 (18.60) | 02 (15.38) |       |
| No                                                                                                                                       | 74 (67.89)  | 70 (81.40) | 11 (84.62) | 0.087 |
| 12. Do you suggest keeping drug register of animals?                                                                                     |             |            |            |       |
| Yes                                                                                                                                      | 83 (76.15)  | 65 (75.58) | 07 (53.85) |       |
| No                                                                                                                                       | 26 (23.85)  | 21 (24.42) | 05 (38.46) |       |
| Blank                                                                                                                                    | 0           | 0.00       | 01 (07.69) | 0.072 |
| 13. Do you prefer combine antibiotics to ensure therapeutic success?                                                                     |             |            |            |       |
| Yes                                                                                                                                      | 70 (64.22)  | 57 (66.28) | 08 (61.54) |       |
| No                                                                                                                                       | 39 (35.78)  | 29 (33.72) | 05 (38.46) | 0.919 |
| 14. Do you administer antibiotics to animals without determining their body weight properly?                                             |             |            |            |       |
| Yes                                                                                                                                      | 28 (25.69)  | 22 (25.58) | 04 (30.77) |       |
| No                                                                                                                                       | 80 (73.39)  | 64 (74.42) | 09 (69.23) |       |
| Blank                                                                                                                                    | 01 (0.92)   | 0.00       | 0          | 0.95  |
| 15. Do you consider whether an infection is self-limiting before prescribing antibiotics?                                                |             |            |            |       |
| Yes                                                                                                                                      | 93 (85.32)  | 59 (68.60) | 10 (76.92) |       |
| No                                                                                                                                       | 16 (14.68)  | 25 (29.07) | 03 (23.08) |       |
| Blank                                                                                                                                    | 0           | 02 (02.33) | 0          | 0.032 |
| 16. As the first line of treatment, do you choose new generation antibiotics rather than older generations like penicillin?              |             |            |            |       |
| Yes                                                                                                                                      | 34 (31.19)  | 36 (41.86) | 06 (46.15) |       |
| No                                                                                                                                       | 75 (68.81)  | 50 (58.14) | 07 (53.85) | 0.22  |
| 17. Do you consult with other veterinarian/other educational resources when in doubt of a drug`s mechanism of action?                    |             |            |            |       |
| Yes                                                                                                                                      | 104 (94.41) | 83 (96.51) | 12 (92.31) |       |
| No                                                                                                                                       | 05 (04.59)  | 03 (03.49) | 01 (07.69) | 0.615 |
| 18. Do you suggest clients to vaccinate their animals against preventable diseases?                                                      |             |            |            |       |
| Yes                                                                                                                                      | 108 (99.08) | 86 (100)   | 11 (84.62) |       |
| No                                                                                                                                       | 01 (0.92)   | 0.00       | 02 (15.38) | 0.01  |

198

## 199 Discussion

200 The present study explored the knowledge, attitude, and practice of the Bangladeshi veterinary  
 201 practitioners regarding antibiotic use and resistance. It was found that some vets had gaps in  
 202 knowledge in certain crucial concepts, for example, many practitioners considered antibiotics



203 and antimicrobials to be the same. Failure to differentiate between antimicrobials and antibiotics  
204 and their roles can be a major reason for inappropriate antibiotic prescribing such as prescribing  
205 antibiotics for viral infections. Another surprising finding was that although most knew that  
206 antibiotics cannot cure viral infections, one-third of the vets believed antibiotics would speed up  
207 cold, cough, or other viral infections. However, there is no evidence that antibiotics can cure  
208 viral infections or speed up recovery of viral infections such as common cold [22,23].

209 Nearly all veterinarians were aware of antibiotic withdrawal period and considered it important  
210 to maintain an appropriate withdrawal period prior to selling animals treated with antibiotics in  
211 order to avoid antibiotic residues in animals. However paradoxically, while prescribing  
212 antibiotics, only one out of four practitioners mentioned the withdrawal period in the  
213 prescriptions. This may happen probably because practitioners do not have the knowledge of the  
214 withdrawal periods of the specific antibiotics they prescribe, or because they think the farmers  
215 will not understand or follow instructions related to withdrawal periods anyway. Studies have  
216 shown that most Bangladeshi farmers do not have knowledge on antibiotic withdrawal period  
217 [10,11]. Non adherence to the required withdrawal periods may result in the presence of residual  
218 antibiotics in food animal products [24]. Antibiotic residues can be toxic to humans as well as  
219 may contribute to the development of AMR [24,25].

220 Prescribing antibiotics based on the results of susceptibility testing is recommended to make sure  
221 that the prescribed regimen is effective against the infection. However, in this study, such  
222 practice was not often followed by the practitioners even after the initial treatment failed. This  
223 can partially be explained by the fact that most areas of Bangladesh did not have any facility to  
224 test antimicrobial sensitivity, as reported by the veterinarians. The absence of susceptibility data  
225 can also promote combined antibiotic therapy since the vets may want to prescribe more than

226 one drug for maximizing the chance of therapeutic success with the hope that if one drug is  
227 found ineffective, the others will work. A study of the veterinary surgeons of the United  
228 Kingdom also reported similar findings where the surgeons only occasionally carried out  
229 susceptibility testing [26].

230 The use of antibiotics for disease prevention of animals by farmers and poultry dealers have been  
231 reported in Bangladesh [8], although such practices are not recommended [14]. Most  
232 veterinarians in this study do not consider the use of antimicrobials for disease prevention.  
233 Instead, the participants have shown a very positive attitude towards vaccination for both  
234 infection prevention and lowering the use of antibiotics. Given the fact that about half of the  
235 most significant animal diseases are of viral origins [27], vaccination can be very effective and  
236 efficient in lowering the occurrences of infectious diseases in animals and will subsequently  
237 confer financial gains to the farmers as well as help to minimize unnecessary use of antibiotics.  
238 Vaccines have also been recommended for infection prevention by WHO [14].

239 Participants were knowledgeable about antibiotic resistance, its causes, and its consequences.  
240 However, unless such knowledge is translated into practice, no real benefit will be achieved. We  
241 have identified a number of inappropriate practices by the veterinarians including excessive  
242 antibiotic prescribing, prescribing antibiotics over the phone without examining animals, not  
243 relying on susceptibility testing, not mentioning antibiotic withdrawal period in prescription, etc.

244 This survey revealed the varied difference in knowledge, attitude and practice of antibiotics use  
245 among different aged group of veterinarians in Bangladesh. It was not conclusively established  
246 the variation of predefined questions answer with the different aged group of vets. From this  
247 study it revealed that old aged vets with higher training or field based training have a higher  
248 knowledge of appropriate use of antibiotics and AMR. The difference has observed among vets

249 aged groups that possibly could have the link to work experiences over time. To understand the  
250 perceptions and barriers, further investigation is required to appropriate use of antibiotics in  
251 livestock and in poultry among the vets subpopulation. It would help the policy makers and  
252 academicians to ensure proper training and impart practical field based knowledge of appropriate  
253 use of antibiotics and AMR to the vets students, young vets and all level aged groups of vets.

254 Another major problem is Bangladeshi farmers rely more upon village doctors, traditional  
255 healers and drug sellers and consider government veterinarians as the last resort for seeking  
256 health services for their livestock [9]. This trend needs to change and qualified veterinarians  
257 should be the primary source of advice in order to promote rational antibiotic use. Veterinarians  
258 should also play an active role in dispelling misconceptions of the farmers surrounding  
259 antibiotics, and themselves should adopt the appropriate practices. The government should focus  
260 on implementing the laws pertaining to judicious use of antibiotics, as well as recruiting more  
261 qualified veterinarians so that farmers can have easy access to them.

262

## 263 **Limitations**

264 A few limitations were witnessed during conduct the current study. The number of participants  
265 in the survey was low that may be due to several factors such as unwillingness to participate or  
266 lack of internet accessibility. Sometimes respondents may have declined to share information  
267 they considered inappropriate or mistaken, resulting in an under-reporting of certain aspects on  
268 antibiotics and AMR knowledge and practices. The study could not meet the exact proportional  
269 number of respondents with anticipated geographic locations due to freedom of choice of the  
270 respondents.

271

272

273

## 274 **Conclusion**

275 The study findings suggest policy guidelines and advocacy to the public and private veterinarians  
276 in improving prudent use of antibiotics. Antimicrobial stewardship program in the public and  
277 private veterinary hospitals are needed to be initiated to promote the rational use of antibiotics.  
278 Improved knowledge and awareness of the veterinarians through continuous education and  
279 training can enhance the rational use of antibiotics. Dissemination of regularly updated national  
280 antibiotic use guidelines in food animals, understanding the role of good biosecurity and  
281 vaccination practices in disease prevention, including antimicrobial susceptibility testing at  
282 affordable costs with easy accessibility are the significant factors that need attention to combat  
283 the rising AMR in veterinary sector in Bangladesh.

284

## 285 **Disclosure of potential conflicts of interest**

286 The authors declare that they have no conflict of interest.

## 287 **Supporting Information**

288 **S1 Text. Questionnaire for KAP survey on antibiotics and AMR.**

289

290

291

292

## 293 **References**

- 294 1. Van Boeckel TP, Brower C, Gilbert M, Grenfell BT, Levin SA, Robinson TP, et al.  
295 Global trends in antimicrobial use in food animals. *Proc Natl Acad Sci USA*. 2015;  
296 112(18):5649–54. <https://doi.org/10.1073/pnas.1503141112>
- 297 2. Holmes AH, Moore LSP, Sundsfjord A, Steinbakk M, Regmi S, Karkey A, et al.  
298 Understanding the mechanisms and drivers of antimicrobial resistance. *Lancet*. 2016;  
299 387(10014):176–87. [https://doi.org/10.1016/s0140-6736\(15\)00473-0](https://doi.org/10.1016/s0140-6736(15)00473-0)
- 300 3. Aidara-Kane A, Angulo FJ, Conly J, Minato Y, Silbergeld EK, McEwen SA, et al. World  
301 Health Organization (WHO) guidelines on use of medically important antimicrobials in  
302 food-producing animals. *Antimicrob Resist Infect Control*. 2018; 7(1):1–8.  
303 <https://doi.org/10.1186/s13756-017-0294-9>
- 304 4. Jim O’Neill. Tackling Drug-Resistant Infections Globally: Final Report and  
305 Recommendations. 2016. <https://apo.org.au/node/63983>
- 306 5. Tang KL, Caffrey NP, Nóbrega DB, Cork SC, Ronksley PE, Barkema HW, et al.  
307 Restricting the use of antibiotics in food-producing animals and its associations with  
308 antibiotic resistance in food-producing animals and human beings: a systematic review  
309 and meta-analysis. *Lancet Planet Heal*. 2017; 1(8):e316–27.  
310 [https://doi.org/10.1016/s2542-5196\(17\)30141-9](https://doi.org/10.1016/s2542-5196(17)30141-9)
- 311 6. Ahmed I, Rabbi MB, Sultana S. Antibiotic resistance in Bangladesh: A systematic review.  
312 *Int J Infect Dis*. 2019; 80:54–61. <https://doi.org/10.1016/j.ijid.2018.12.017>
- 313 7. Hasan B, Faruque R, Drobni M, Waldenström J, Sadique A, Ahmed KU, et al. High  
314 prevalence of antibiotic resistance in pathogenic *Escherichia coli* from large- and small-  
315 scale poultry farms in Bangladesh. *Avian Dis*. 2011; 55(4):689–92.  
316 <https://doi.org/10.1637/9686-021411-reg.1>
- 317 8. Masud A Al, Rousham EK, Islam MA, Alam MU, Rahman M, Mamun A Al, et al.  
318 Drivers of Antibiotic Use in Poultry Production in Bangladesh: Dependencies and  
319 Dynamics of a Patron-Client Relationship. *Front Vet Sci*. 2020; 7(February):1–9.  
320 <https://doi.org/10.3389/fvets.2020.00078>
- 321 9. Roess AA, Winch PJ, Ali NA, Akhter A, Afroz D, El Arifeen S, et al. Animal husbandry  
322 practices in rural Bangladesh: Potential risk factors for antimicrobial drug resistance and  
323 emerging diseases. *Am J Trop Med Hyg*. 2013; 89(5):965–70.  
324 <https://doi.org/10.4269/ajtmh.12-0713>
- 325 10. Saiful IK., Shiraj-Um-Mahmuda S, Hazzaz-Bin-Kabir M. Antibiotic usage patterns in  
326 selected broiler farms of Bangladesh and their public health implications. *J Public Heal*

- 327 Dev Ctries J Public Heal Dev Ctries. 2016; 2(3):276–84. <http://www.jphdc.org/>
- 328 11. Ferdous J, Sachi S, Al Noman Z, Hussani SMAK, Sarker YA, Sikder MH. Assessing  
329 farmers' perspective on antibiotic usage and management practices in small-scale layer  
330 farms of Mymensingh district, Bangladesh. *Vet World*. 2019; 12(9):1441–7.  
331 <https://doi.org/10.14202/vetworld.2019.1441-1447>
- 332 12. Rahman MA, Rahman MM, Abdullah MS, Sayeed MA, Rashid MH, Mahmud R, et al.  
333 Epidemiological assessment of clinical poultry cases through the government veterinary  
334 hospital-based passive surveillance system in Bangladesh: a case study. *Trop Anim Health*  
335 *Prod*. 2019; 51(4):967–75. <https://doi.org/10.1007/s11250-018-1782-5>
- 336 13. Sarker MS, Ahaduzzaman M, Ghosh SK, Sayeed MA, Bary MA. Crosssectional survey  
337 on prescribing patterns for food animal medications in Bangladesh. *J Dairy Vet Anim Res*.  
338 2016; 3(4):151-153. <https://doi.org/10.15406/jdvar.2016.03.00089>
- 339 14. World Health Organization. WHO guidelines on use of medically important  
340 antimicrobials in food-producing animals. World Health Organization. 2017. pp. 1–88.  
341 [https://apps.who.int/iris/bitstream/handle/10665/258970/9789241550130-](https://apps.who.int/iris/bitstream/handle/10665/258970/9789241550130-eng.pdf?sequence=1%0Ahttp://apps.who.int/iris/bitstream/handle/10665/258970/9789241550130-eng.pdf?sequence=1)  
342 [eng.pdf?sequence=1%0Ahttp://apps.who.int/iris/bitstream/handle/10665/258970/9789241](http://apps.who.int/iris/bitstream/handle/10665/258970/9789241550130-eng.pdf?sequence=1)  
343 [550130-eng.pdf?sequence=1](http://apps.who.int/iris/bitstream/handle/10665/258970/9789241550130-eng.pdf?sequence=1)
- 344 15. Bangladesh National Parliament (BNP). *Bangladesh Gazette*. 2013; 205: 2811-2818.
- 345 16. Hughes LA, Pinchbeck G, Callaby R, Dawson S, Clegg P, Williams N. Antimicrobial  
346 prescribing practice in UK equine veterinary practice. *Equine Vet J*. 2013; 45(2):141–7.  
347 <https://doi.org/10.1111/j.2042-3306.2012.00602.x>
- 348 17. Cattaneo AA, Wilson R, Doohan D, LeJeune JT. Bovine veterinarians' knowledge,  
349 beliefs, and practices regarding antibiotic resistance on Ohio dairy farms. *J Dairy Sci*.  
350 2009; 92(7):3494–502. <https://doi.org/10.3168/jds.2008-1575>
- 351 18. Barden LS, Dowell SF, Schwartz B, Lackey C. Current attitudes regarding use of  
352 antimicrobial agents: Results from physicians' and parents' focus group discussions. *Clin*  
353 *Pediatr (Phila)*. 1998; 37(11):665–72. <https://doi.org/10.1177/000992289803701104>
- 354 19. De Briyne N, Atkinson J, Pokludová L, Borriello SP, Price S. Factors influencing  
355 antibiotic prescribing habits and use of sensitivity testing amongst veterinarians in Europe.  
356 *Vet Rec*. 2013; 173(19):475. <https://doi.org/10.1136/vr.101454>
- 357 20. Busani L, Graziani C, Franco A, Di Egidio A, Binkin N, Battisti A. Survey of the  
358 knowledge, attitudes and practice of Italian beef and dairy cattle veterinarians concerning  
359 the use of antibiotics. *Vet Rec*. 2004; 155(23):733–8. PMID: 15623086
- 360 21. Chapot L, Sarker MS, Begum R, Hossain D, Akter R, Hasan MM, et al. Knowledge,  
361 Attitudes and Practices Regarding Antibiotic Use and Resistance among Veterinary  
362 Students in Bangladesh. *Antibiotics*. 2021 Mar; 10(3):332.  
363 <https://doi.org/10.3390/antibiotics10030332>
- 364 22. Allan GM, Arroll B. Prevention and treatment of the common cold: making sense of the  
365 evidence. *CMAJ*. 2014; 186(3):190–9. <https://doi.org/10.1503/cmaj.121442>

- 366 23. Kenealy T, Arroll B. Antibiotics for the common cold and acute purulent rhinitis.  
367 Cochrane Database Syst Rev. 2013 June 4; CD000247.  
368 <https://doi.org/10.1002/14651858.cd000247.pub3>
- 369 24. Kaneene JB, Miller R. Problems associated with drug residues in beef from feeds and  
370 therapy. Rev Sci Tech. 1997; 16(2):694–708. <https://doi.org/10.20506/rst.16.2.1055>
- 371 25. Beyene T. Veterinary Drug Residues in Food-animal Products: Its Risk Factors and  
372 Potential Effects on Public Health. J Vet Sci Technol. 2015; 07(01).  
373 <https://doi.org/10.4172/2157-7579.1000285>
- 374 26. Coyne LA, Latham SM, Dawson S, Donald IJ, Pearson RB, Smith RF, et al.  
375 Antimicrobial use practices, attitudes and responsibilities in UK farm animal veterinary  
376 surgeons. Prev Vet Med. 2018; 161(October):115–26.  
377 <https://doi.org/10.1016/j.prevetmed.2018.10.021>
- 378 27. Brun A. Vaccines and vaccination for veterinary viral diseases: A general overview.  
379 Methods Mol Biol. 2016; 1349:1–24. [https://doi.org/10.1007/978-1-4939-3008-1\\_1](https://doi.org/10.1007/978-1-4939-3008-1_1)

380  
381  
382  
383  
384  
385  
386  
387  
388  
389  
390  
391  
392  
393  
394

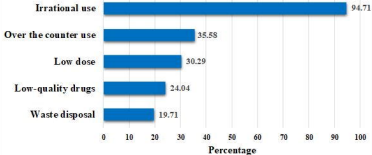



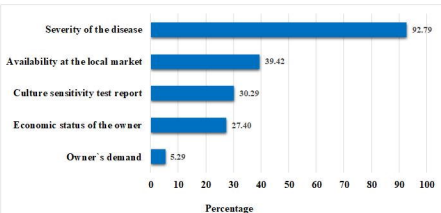

Source: https://medrxiv.org/content/10.1101/2021.06.03.21258263v1.full.pdf
